# Supplementary material for: New Insights on the Mechanisms Affecting Fertility in Men with Non-Seminoma Testicular Cancer before Cancer Therapy
Source: PubMed Central journal article supplement — World J Mens Health. 2018 Dec 21;38(2):198–207. doi: 10.5534/wjmh.180099 (PMC7076305; doi:10.5534/wjmh.180099), 2018-12-21
Supplement: wjmh-38-198-s001.pdf [file wjmh-38-198-s001.pdf]

**Supplementary Table 1.** List of the primary and secondary antibodies used in this study

| Antibody            | Source | KDa | Dilution | Vendor | Catalog # |
|---------------------|--------|-----|----------|--------|-----------|
| ACR                 | Rabbit | 46  | 1:1,000  | Abcam  | ab203289  |
| ANXA2               | Mouse  | 38  | 1:1,000  | Abcam  | ab54771   |
| ATP1A4              | Rabbit | 100 | 1:10,000 | Abcam  | ab76020   |
| NDUFS1              | Rabbit | 79  | 1:10,000 | Abcam  | ab157221  |
| UQCRC2              | Mouse  | 48  | 1:1,000  | Abcam  | ab110411  |
| Mouse <sup>a</sup>  | Rabbit | --- | 1:10,000 | Abcam  | ab6728    |
| Rabbit <sup>a</sup> | Goat   | --- | 1:10,000 | Abcam  | ab97051   |

ACR: acrosin, ANXA2: annexin A2, ATP1A4: sodium/potassium-transporting ATPase subunit alpha-4, NDUFS1: NADH-ubiquinone oxidoreductase 75 kDa subunit, UQCRC2: cytochrome b-c1 complex subunit 2.

<sup>a</sup>Secondary antibody.
